# Supplementary material for: ALD-grown two-dimensional TiSx metal contacts for MoS2 field-effect transistors
Source: Royal Society of Chemistry journal article supplement (doi:10.1039/d3na00387f), 2023-01-01
Supplement: d3na00387f1.pdf [file d3na00387f1.pdf]

## Supporting Information

### ALD-Grown Two-Dimensional $\text{TiS}_x$ Metal Contacts for $\text{MoS}_2$ Field-Effect Transistors

*Reyhaneh Mahlouji*<sup>1</sup>, *Wilhelmus M.M.(Erwin) Kessels*<sup>1</sup>, *Abhay A. Sagade*<sup>2</sup> and *Ageeth A. Bol*<sup>1</sup>

<sup>1</sup>Department of Applied Physics, Eindhoven University of Technology, P.O. Box 513, 5600 MB Eindhoven, The Netherlands

<sup>2</sup>Laboratory for Advanced Nanoelectronic Devices, Department of Physics and Nanotechnology, SRM Institute of Science and Technology, SRM Nagar, Kattankulathur 603 203, Tamil Nadu, India.

Author email: [abhaya@srmist.edu.in](mailto:abhaya@srmist.edu.in), [a.a.bol@tue.nl](mailto:a.a.bol@tue.nl)

### S.1 $I$ - $V$ characterization of the second set of MoS<sub>2</sub> FETs with various TiS<sub>x</sub> contact thicknesses

To verify the repeatability of the data shown in **Figure 1(b)** of the main text, a second set of MoS<sub>2</sub> FETs with various TiS<sub>x</sub> contact thicknesses were fabricated on  $\sim 87$  nm SiO<sub>2</sub>/Si ( $p^{++}$ ) substrates, and their electrical performance were compared to a reference device with 5/95 nm Ti/Au contacts. The MoS<sub>2</sub> channel aspect ratio was also kept similar to the initial set shown in the main text (500 nm long, 1  $\mu$ m wide and  $\sim 1.2$  nm thick). **Figure S1(a)** and (b) display the transfer data in linear and semilog scales, respectively. Similar to what is observed for the initial set (as shown in **Figure 1(b)** of the main text), the entire TiS<sub>x</sub>-contacted MoS<sub>2</sub> FETs outperform the reference case. Furthermore, with reducing the TiS<sub>x</sub> contact thickness, the ON-state current increases and the threshold voltage ( $V_T$ ) shifts to more negative values, indicating an increase in the MoS<sub>2</sub> electrostatic doping.

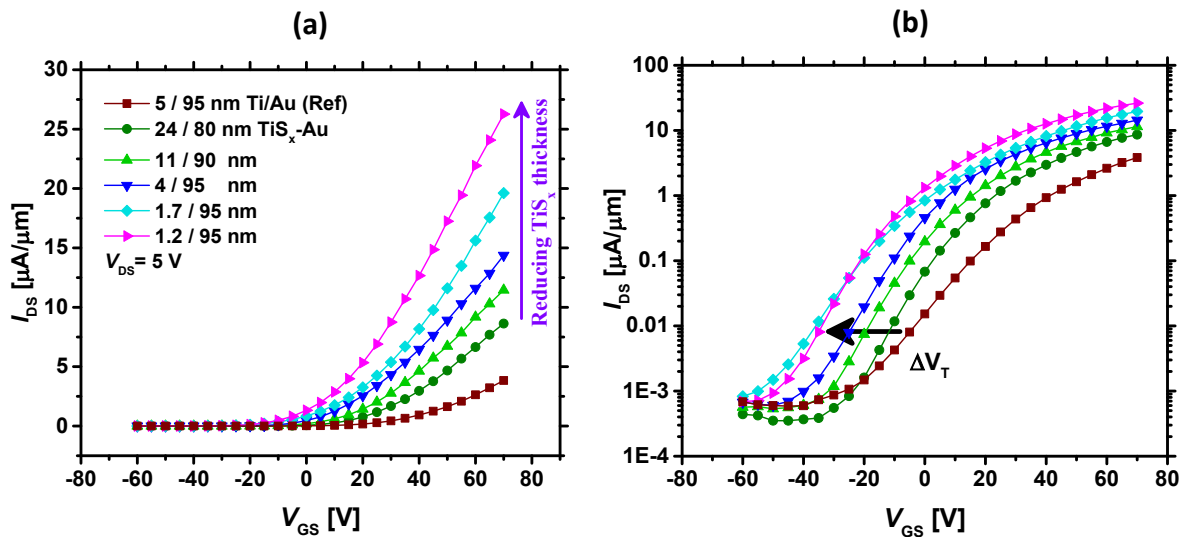

**Figure S1** (a) Linear and (b) semilog transfer curves for a second set of MoS<sub>2</sub> FETs with various TiS<sub>x</sub> contact thicknesses. Data for the reference case with 5/95 nm of Ti/Au contacts are also included.

## S.2 Statistical analysis of the second set of MoS<sub>2</sub> FETs with various TiS<sub>x</sub> contact thicknesses

Figure S2(a), (b), (c) and (d) show the average statistical data of  $I_{ON}$ , maximum  $\mu_{FE}$ ,  $I_{OFF}$  as well as ON/OFF current ratio, respectively. The data were obtained by measuring three-four devices on each studied sample. Comparing the results derived from the second set of devices with those from the first set (Figure 2 in the main text) confirm that ~1.2 nm TiS<sub>x</sub> is the most optimal thickness for the contacts to the ALD-based MoS<sub>2</sub> FETs.

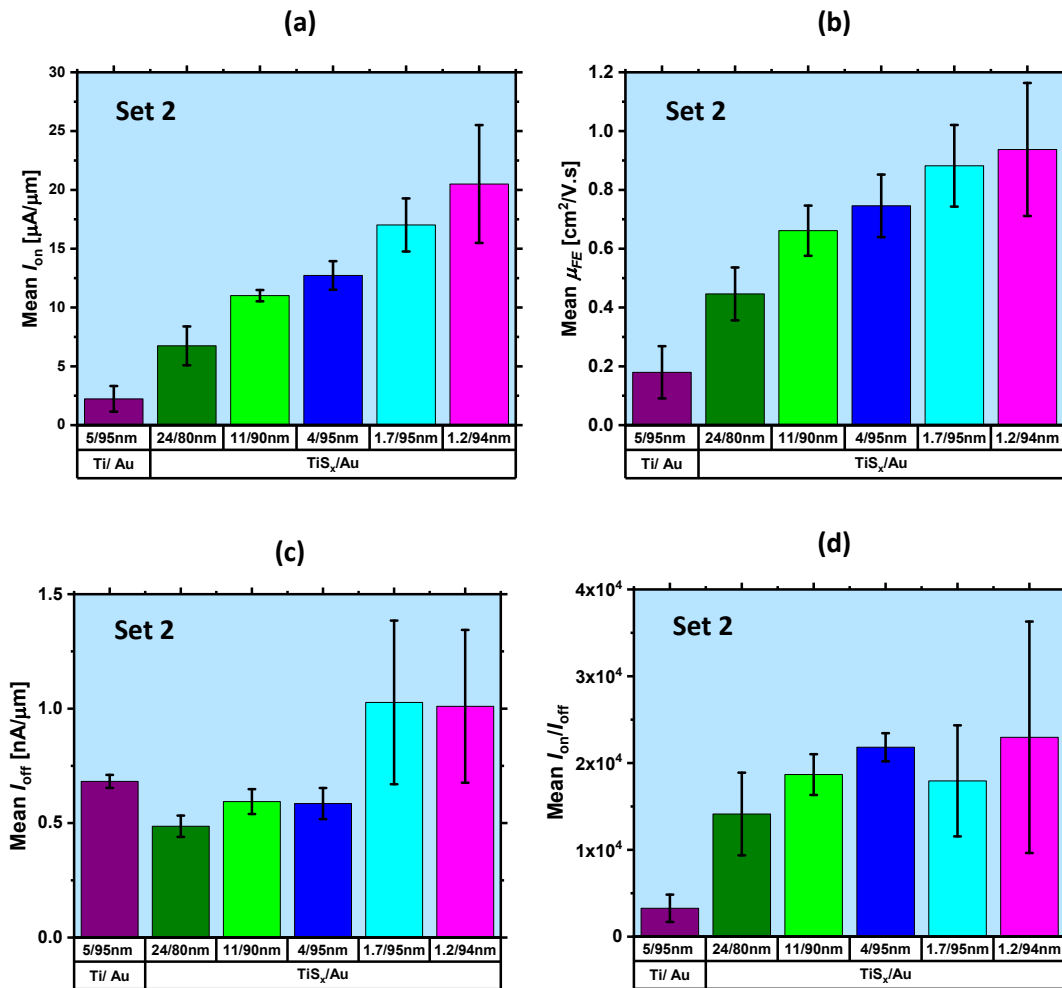

Figure S2 Average statistical data of (a)  $I_{ON}$ , (b) maximum  $\mu_{FE}$ , (c)  $I_{OFF}$  and (d) ON/OFF current ratio for the second set of MoS<sub>2</sub> FETs with various TiS<sub>x</sub> thicknesses, all obtained at  $V_{DS} = 5$  V. Data for the reference case with Ti/Au contacts is also included.

### S.3 TCAD simulation parameters

The TCAD simulation parameters were tuned for the device characteristics shown in **Figure 1(b)** and **Figure 2** of the main manuscript. The materials properties such as mobility, band gap ( $E_g$ ), work function and etc. were chosen based on the experimental data provided in the SI (section S.1 and S.2) as well as Ref. 61 of the main manuscript.<sup>1</sup> Detailed thickness dependent properties reported by Gao et al.<sup>1</sup> in Table-1 of their manuscript were also used. **Table 1** shows some of these parameters employed in the simulations.

**Table 1- Materials and properties used for TCAD simulations**

| Material         | Property       |                         |                     |
|------------------|----------------|-------------------------|---------------------|
|                  | Thickness [nm] | Band gap ( $E_g$ ) [eV] | Dielectric constant |
| MoS <sub>2</sub> | 1.2            | 1.4                     | 4                   |
| TiS <sub>2</sub> | 1.2            | 1.23                    | 15 <sup>2</sup>     |

### References

- 1 J. Gao and M. Gupta, *npj 2D Mater. Appl.*, 2020, **4**, 26.
- 2 H. El-Kouch, L. El Farh, J. Sayah and A. Challioui, *Chinese Phys. Lett.*, 2015, **32**, 096102.
